# Supplementary material
Source: PubMed Central journal article supplement (PMC4070048)
Supplement: 97320630010191S1.pdf [file 97320630010191S1.pdf]

## Supplementary material:

**Table 1:** Detail of the interaction of the used in this study against Caspase-8

| Compounds       | $\Delta G$ (Kcal/mol) | Residues Involved            |                                          |
|-----------------|-----------------------|------------------------------|------------------------------------------|
|                 |                       | Hydrogen bond formation      | Hydrophobic interaction                  |
| Rosmarinic acid | -7.10                 | R258, N261, S316, H317, C360 | R258, R260, H317, C360                   |
| Curcumin        | -7.08                 | R260, N261, D266, H317, Q358 | R260, N261, G262, T263, H317, A359, C360 |
| Bilobalide      | -3.85                 | R260                         | R260, H317, C360                         |
| Quercetin       | -4.89                 | R260, C360                   | R258, R260, H317, A359, C360             |
| EGCG            | -5.34                 | R258, D259, R260, S316, H317 | R258, R260, H317, A359, C360             |
| Resveratrol     | -5.56                 | R258, S316, H317, C360       | R258, H317, A359, C360                   |
| Huperzine A     | -4.28                 | E358                         | R260, T263, H317, A359                   |
| Luteolin        | -5.83                 | R258, D259, R260, E358       | R258, H317, A359, C360                   |
